# Supplementary material
Source: publisher figshare collection journal article supplement (https://karger.figshare.com/articles/dataset/_/5129866)
Supplement: Supplementary file 1 [file 1]

**Supplementary table 1. Changes in n-3 levels post- vs pre-supplementation according to genotype for tagged SNPs (n=208 individuals)**

|              |                         | $\Delta$ n-3 <sup>a</sup> |               |                | <i>P</i> values <sup>b</sup> |                 |             |
|--------------|-------------------------|---------------------------|---------------|----------------|------------------------------|-----------------|-------------|
|              |                         | Common HMZ                | HTZ           | Rare HMZ       | Genotype                     | Supplementation | Interaction |
| <i>IQCJ</i>  | rs12497650              | 5.152 ± 1.942             | 4.677 ± 2.000 | 4.427 ± 1.573  | -                            | <0.0001         | -           |
|              | rs4501157               | 4.879 ± 1.893             | 4.833 ± 1.959 | 4.946 ± 2.183  | -                            | <0.0001         | -           |
|              | rs13091349 <sup>c</sup> | 4.993 ± 2.036             | 4.576 ± 1.712 | -              | -                            | <0.0001         | -           |
|              | rs2044704               | 4.794 ± 1.894             | 5.010 ± 1.885 | 4.819 ± 2.536  | -                            | <0.0001         | -           |
|              | rs1962071               | 4.762 ± 1.832             | 4.864 ± 2.087 | 5.475 ± 2.057  | -                            | <0.0001         | -           |
|              | rs7634829               | 4.773 ± 1.674             | 4.792 ± 2.061 | 5.212 ± 2.092  | -                            | <0.0001         | -           |
|              | rs2621294               | 4.842 ± 1.861             | 4.748 ± 1.936 | 5.361 ± 2.115  | -                            | <0.0001         | -           |
|              | rs6800211               | 5.183 ± 2.023             | 4.634 ± 1.844 | 4.160 ± 1.771  | -                            | <0.0001         | 0.049       |
|              | rs17782879              | 4.763 ± 1.770             | 4.777 ± 2.063 | 5.781 ± 2.144  | -                            | <0.0001         | -           |
|              | rs1868414               | 5.138 ± 2.111             | 4.628 ± 1.809 | 4.721 ± 1.605  | -                            | <0.0001         | -           |
|              | rs2595260               | 4.815 ± 1.893             | 4.839 ± 1.941 | 5.324 ± 2.382  | -                            | <0.0001         | -           |
|              | rs6763890               | 4.858 ± 1.902             | 4.807 ± 2.079 | 5.0640 ± 1.773 | -                            | <0.0001         | -           |
|              | rs9827242 <sup>c</sup>  | 4.962 ± 2.007             | 4.691 ± 1.836 | -              | -                            | <0.0001         | -           |
|              | rs1449009*              | 4.783 ± 1.961             | 5.015 ± 1.788 | 4.762 ± 2.443  | -                            | <0.0001         | -           |
|              | rs2621309*              | 4.793 ± 1.933             | 5.025 ± 1.815 | 4.705 ± 2.488  | -                            | <0.0001         | -           |
|              | rs61332355*             | 4.816 ± 1.863             | 4.939 ± 2.179 | 5.293 ± 1.479  | -                            | <0.0001         | -           |
| <i>NXPH1</i> | rs6956210               | 4.920 ± 1.813             | 4.716 ± 2.169 | 5.150 ± 2.048  | -                            | <0.0001         | -           |
|              | rs2107779               | 4.614 ± 1.993             | 4.989 ± 1.906 | 4.999 ± 1.973  | -                            | <0.0001         | -           |
|              | rs10273195 <sup>c</sup> | 4.913 ± 1.960             | 4.782 ± 1.938 | -              | -                            | <0.0001         | -           |
|              | rs12216689              | 4.805 ± 2.070             | 5.079 ± 1.752 | 4.166 ± 2.019  | 0.03                         | <0.0001         | -           |
|              | rs6963644               | 4.830 ± 1.956             | 5.072 ± 1.929 | -              | 0.03                         | <0.0001         | -           |
|              | rs17150341              | 4.982 ± 1.866             | 4.640 ± 2.042 | 5.273 ± 1.926  | -                            | <0.0001         | -           |
|              | rs1013868               | 4.659 ± 1.939             | 5.051 ± 2.016 | 4.930 ± 1.674  | -                            | <0.0001         | -           |
|              | rs12537067 <sup>c</sup> | 4.913 ± 1.916             | 4.631 ± 2.122 | -              | -                            | <0.0001         | -           |
|              | rs4318981               | 4.811 ± 2.026             | 4.851 ± 1.981 | 5.074 ± 1.647  | -                            | <0.0001         | -           |
|              | rs17153997              | 4.759 ± 1.910             | 4.911 ± 2.108 | 4.889 ± 1.652  | -                            | <0.0001         | -           |
|              | rs7801099               | 4.989 ± 1.744             | 4.780 ± 2.096 | 4.902 ± 1.884  | -                            | <0.0001         | -           |
|              | rs4725120               | 4.982 ± 2.063             | 4.743 ± 1.984 | 4.972 ± 1.722  | -                            | <0.0001         | -           |
|              | rs1859275               | 5.029 ± 1.967             | 4.624 ± 2.117 | 5.111 ± 1.234  | -                            | <0.0001         | -           |
|              | rs10238726              | 4.882 ± 1.911             | 4.746 ± 1.992 | 5.214 ± 1.997  | -                            | <0.0001         | -           |
|              | rs1012960               | 5.017 ± 2.037             | 4.944 ± 2.005 | 4.514 ± 1.692  | -                            | <0.0001         | -           |
|              | rs11767429              | 5.122 ± 2.052             | 4.711 ± 1.738 | 4.180 ± 2.042  | 0.008                        | <0.0001         | -           |

|              |                         |               |               |               |   |         |      |
|--------------|-------------------------|---------------|---------------|---------------|---|---------|------|
|              | rs4333500               | 4.766 ± 1.744 | 4.919 ± 2.038 | 4.929 ± 2.146 | - | <0.0001 | -    |
|              | rs7793115 <sup>c</sup>  | 4.883 ± 1.977 | 4.794 ± 1.872 | -             | - | <0.0001 | -    |
|              | rs7799856               | 5.055 ± 2.072 | 4.729 ± 1.945 | 4.816 ± 1.749 | - | <0.0001 | -    |
|              | rs7806226 <sup>c</sup>  | 4.966 ± 2.044 | 4.598 ± 1.651 | -             | - | <0.0001 | -    |
|              | rs13221144              | 4.964 ± 2.016 | 4.665 ± 1.878 | 5.157 ± 1.688 | - | <0.0001 | -    |
|              | rs17406479 <sup>c</sup> | 4.909 ± 2.014 | 4.790 ± 1.836 | -             | - | <0.0001 | -    |
|              | rs10486228 <sup>c</sup> | 4.765 ± 1.855 | 5.072 ± 2.125 | -             | - | <0.0001 | -    |
|              | rs17154569 <sup>c</sup> | 4.640 ± 1.895 | 5.337 ± 1.995 | -             | - | <0.0001 | -    |
|              | rs4141002 <sup>c</sup>  | 4.813 ± 1.860 | 5.041 ± 2.227 | -             | - | <0.0001 | -    |
|              | rs7805772               | 4.942 ± 1.985 | 4.811 ± 1.904 | 4.379 ± 1.827 | - | <0.0001 | -    |
|              | rs2349780               | 4.559 ± 1.921 | 5.026 ± 1.867 | 5.082 ± 2.306 | - | <0.0001 | -    |
|              | rs2107474               | 4.684 ± 2.005 | 4.825 ± 1.987 | 5.314 ± 1.706 | - | <0.0001 | -    |
|              | rs11769942              | 4.811 ± 1.882 | 4.945 ± 2.074 | 4.782 ± 1.784 | - | <0.0001 | -    |
|              | rs6952383 <sup>c</sup>  | 4.856 ± 1.939 | 4.914 ± 2.915 | -             | - | <0.0001 | -    |
|              | rs6974252 <sup>c</sup>  | 4.889 ± 1.983 | 4.804 ± 1.864 | -             | - | <0.0001 | -    |
|              | rs10265408              | 4.957 ± 1.670 | 4.616 ± 2.228 | 5.239 ± 1.851 | - | <0.0001 | 0.04 |
|              | rs2189904               | 4.981 ± 1.896 | 4.672 ± 2.062 | 5.222 ± 1.634 | - | <0.0001 | -    |
|              | rs2057862               | 4.555 ± 1.955 | 5.028 ± 1.788 | 5.110 ± 2.283 | - | <0.0001 | -    |
| <i>PHF17</i> | rs2217023 <sup>c</sup>  | 4.936 ± 1.990 | 4.719 ± 1.883 | -             | - | <0.0001 | -    |
|              | rs4975270               | 4.768 ± 2.120 | 4.886 ± 2.029 | 4.989 ± 1.479 | - | <0.0001 | -    |
|              | rs11722830 <sup>c</sup> | 4.655 ± 2.039 | 5.199 ± 1.759 | -             | - | <0.0001 | -    |
|              | rs12505447 <sup>c</sup> | 4.686 ± 2.016 | 5.208 ± 1.779 | -             | - | <0.0001 | -    |
|              | rs6534704 <sup>c</sup>  | 4.940 ± 1.959 | 4.412 ± 1.852 | -             | - | <0.0001 | -    |
|              | rs13148510              | 4.878 ± 1.933 | 4.737 ± 2.177 | -             | - | <0.0001 | -    |
|              | rs13143771              | 4.935 ± 2.048 | 4.782 ± 1.915 | 4.837 ± 1.542 | - | <0.0001 | -    |
|              | rs13142964              | 4.837 ± 1.968 | 5.036 ± 1.860 | -             | - | <0.0001 | -    |
| <i>MYB</i>   | rs9321493               | 5.096 ± 1.798 | 4.696 ± 1.970 | 4.896 ± 2.123 | - | <0.0001 | -    |
|              | rs11154794 <sup>c</sup> | 4.761 ± 2.006 | 5.209 ± 1.727 | -             | - | <0.0001 | -    |
|              | rs210798                | 4.928 ± 1.904 | 4.739 ± 2.057 | 5.053 ± 1.790 | - | <0.0001 | -    |
|              | rs210936                | 5.139 ± 1.809 | 4.838 ± 2.058 | 4.602 ± 1.890 | - | <0.0001 | -    |
|              | rs7757388 <sup>c</sup>  | 4.939 ± 1.958 | 4.654 ± 1.925 | -             | - | <0.0001 | -    |
|              | rs210962                | 4.939 ± 1.912 | 4.657 ± 1.974 | 5.075 ± 2.174 | - | <0.0001 | -    |
|              | rs17639758              | 4.848 ± 1.953 | 5.212 ± 1.926 | -             | - | <0.0001 | -    |
|              | rs1013891               | 5.154 ± 1.859 | 4.607 ± 1.838 | 4.796 ± 2.533 | - | <0.0001 | -    |
|              | rs2179308               | 4.989 ± 2.039 | 4.842 ± 1.882 | 4.786 ± 2.023 | - | <0.0001 | -    |

The MIXED procedure (SAS v9.2) for repeated measures adjusted for age, sex and BMI was used to test for the interaction effects

HMZ: homozygotes, HTZ: heterozygotes

<sup>a</sup> Values are means  $\pm$  SD

<sup>b</sup> Nonsignificant p values were removed to lighten the table

<sup>c</sup> HTZ were merged with rare HMZ (dominant model)

\* GWAS hit identified in the *FAS* study
